# Supplementary material for: The Potential Genetic Effect for Yield and Foliar Disease Resistance in Faba Bean (Vicia faba L.) Assessed via Morphological and SCoT Markers
Source: MDPI journal article supplement (doi:10.3390/plants12203645), 2023-10-22
Supplement: s1 [file s1]

Tabel S1. Scaling test of the three crosses for the studied traits.

| Traits                | Crosses | Scaling test |          |           |          |
|-----------------------|---------|--------------|----------|-----------|----------|
|                       |         | A            | B        | C         | D        |
| Plant Height          | Cross 1 | 40.33**      | 31.39**  | 34.32**   | -18.70** |
|                       | Cross 2 | -33.33**     | -66.52** | -59.16    | 20.35    |
|                       | Cross 3 | -18.00**     | -43.10** | -59.96**  | 0.57     |
| No. of Branches/plant | Cross 1 | -0.53        | -3.98**  | -7.45**   | -1.47*   |
|                       | Cross 2 | 0.67         | 0.86     | 0.37**    | -0.58**  |
|                       | Cross 3 | 2.13**       | -0.97    | 1.71**    | 0.27     |
| No. of Pods/Plant     | Cross 1 | -6.54        | 1.1      | -60.64**  | -27.60** |
|                       | Cross 2 | -20.70**     | -6.59    | -7.99     | 9.65     |
|                       | Cross 3 | -2.83        | 5.07     | -27.39**  | -14.81** |
| No. of Seeds/Plant    | Cross 1 | 26.4         | 14.11    | -139.69** | -90.10** |
|                       | Cross 2 | -71.40**     | -56.77** | -54.73**  | 36.72**  |
|                       | Cross 3 | 35.87**      | -41.81** | -42.56**  | -18.31** |
| Seed Yield/Plant      | Cross 1 | 9.65         | -6.42    | -146.29** | -74.76** |
|                       | Cross 2 | -65.93**     | -24.98** | -53.57**  | 18.67**  |
|                       | Cross 3 | 14.07        | -31.51** | -33.27**  | -7.91    |
| Chocolate spot        | Cross 1 | 0.34         | 2.18**   | 2.80**    | 0.14     |
|                       | Cross 2 | -2.33**      | -3.68**  | 0.07      | 3.04**   |
|                       | Cross 3 | 0.01         | -2.93**  | -1.26**   | 0.83**   |
| Rust                  | Cross 1 | -0.26        | 1.43**   | 0.65      | -0.26    |
|                       | Cross 2 | -1.56**      | -4.00**  | -0.18     | 2.69**   |
|                       | Cross 3 | -3.70**      | -1.13**  | 0.62      | 2.73**   |

Table S2. List of SCoT primers and their sequences.

| Primer | Primer sequence (5' → 3') |
|--------|---------------------------|
| SCoT-1 | 5'-ACGACATGGCGACCACGC-3'  |
| SCoT-2 | 5'-ACCATGGCTACCACCGGC-3'  |
| SCoT-3 | 5'-ACGACATGGCGACCCACA-3'  |
| SCoT-4 | 5'-CAATGGCTACCACTAGCG-3'  |
| SCoT-5 | 5'-CAATGGCTACCACTACAG-3'  |
| SCoT-6 | 5'-ACAATGGCTACCACTGAC-3'  |
| SCoT-7 | 5'-ACGACATGGCGACCCAC-3'   |

Figure S1. SCoT-PCR amplification using the selected primers

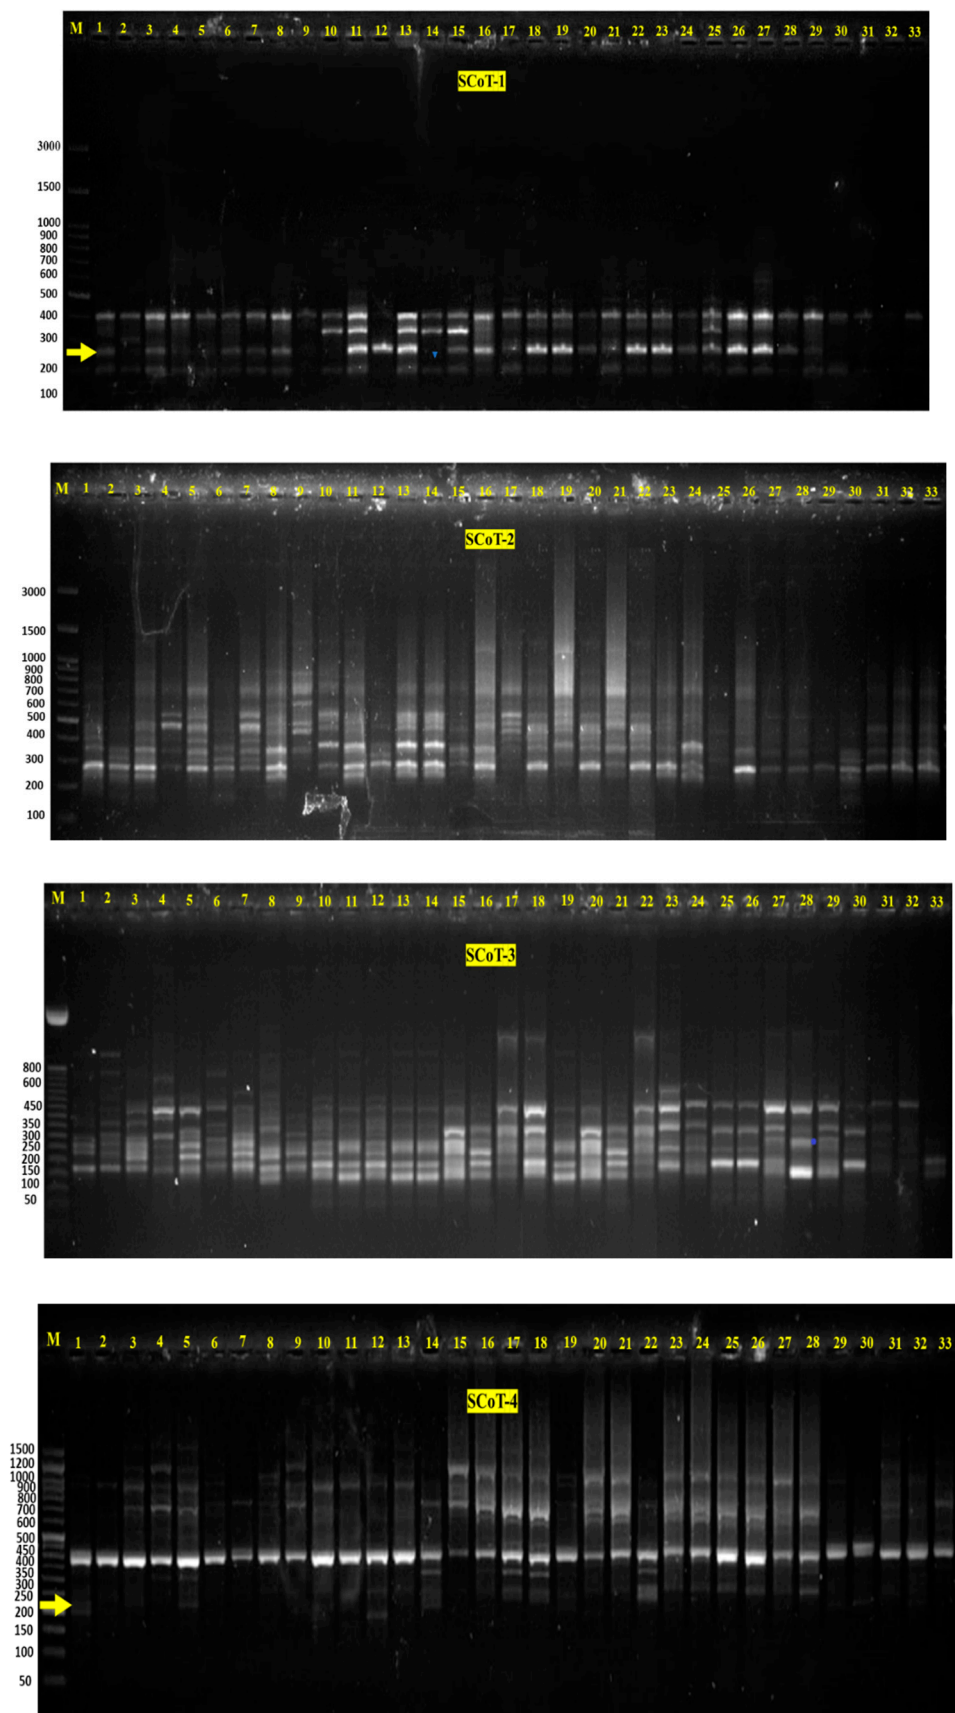

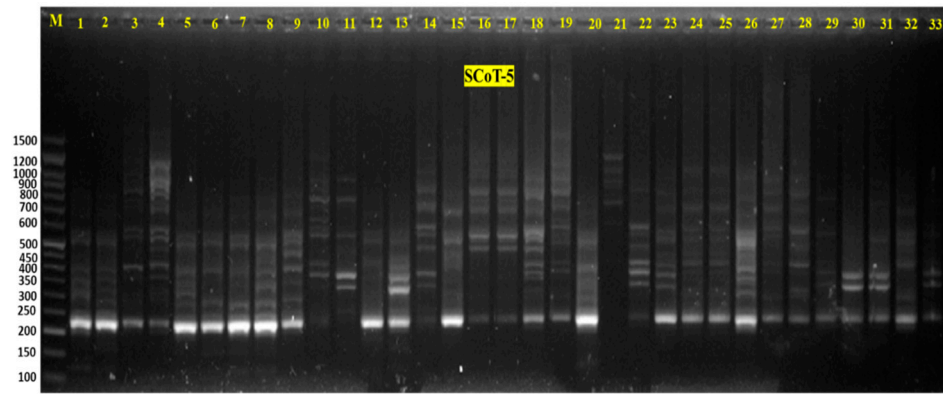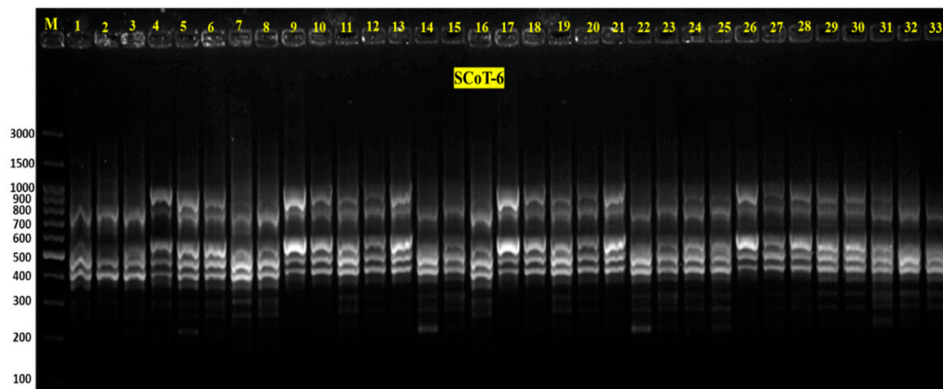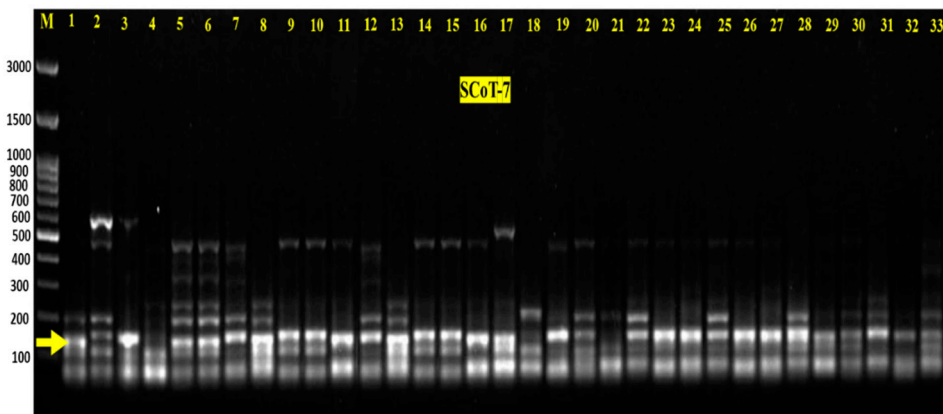

[illegible]
